# Supplementary material for: Naturally occurring fire coral clones demonstrate a genetic and environmental basis of microbiome composition
Source: PubMed Central journal article supplement (PMC8568919; doi:10.1038/s41467-021-26543-x), 2021-11-04
Supplement: 41467_2021_26543_MOESM1_ESM.pdf [file 41467_2021_26543_MOESM1_ESM.pdf]

## Supplementary Information

Naturally occurring fire coral clones demonstrate a genetic and environmental basis of microbiome composition

Dubé CE, Ziegler M, Mercière A, Boissin E, Planes S, Bourmaud CAF, Voolstra CR

### Contents

**Supplementary Table 1.** Two- and one-way permutational multivariate analysis of variance (PERMANOVA) showing the effect and interaction of 'Genotype' and 'Habitat' on bacterial ASV composition (two-way analysis represents the overall variation and one-way analysis represents genetic and environmental variation, separately).

**Supplementary Table 2.** One-way permutational multivariate analysis of variance (PERMANOVA) showing the effect of 'Colony size' on bacterial ASV composition.

**Supplementary Figure 1.** Temperature (**A**) and light (**B**) profiles measured at each of the habitats over time.

**Supplementary Figure 2.** LEfSe analysis displaying predicted functional profiles of the habitat-specific bacterial ASVs for MetaCyc pathways (**A**) and levels 1–3 for individual KOs (**B**).

## Supplementary Table

**Supplementary Table 1.** Two- and one-way permutational multivariate analysis of variance (PERMANOVA) showing the effect and interaction of 'Genotype' and 'Habitat' on bacterial ASV composition (two-way analysis represents the overall variation and one-way analysis represents genetic and environmental variation, separately).

| Factor per analysis                                  | df | F      | R2     | p      |
|------------------------------------------------------|----|--------|--------|--------|
| <b>Overall variation (Two-way)</b>                   |    |        |        |        |
| Genotype                                             | 5  | 1.9494 | 0.0678 | 0.0001 |
| Habitat                                              | 2  | 2.8612 | 0.0398 | 0.0001 |
| Genotype X Habitat                                   | 7  | 1.1788 | 0.0574 | 0.0024 |
| <b>Genetic variation (One-way and Post-hoc test)</b> |    |        |        |        |
| <u>Mid Slope</u>                                     | 3  | 1.2255 | 0.1432 | 0.042  |
| MD_G2 and MD_G6                                      | 1  | 1.4013 | 0.0910 | 0.020  |
| <u>Upper Slope</u>                                   | 5  | 1.8340 | 0.0984 | 0.0001 |
| UP_G1 and UP_G3                                      | 1  | 1.3465 | 0.0381 | 0.043  |
| UP_G1 and UP_G4                                      | 1  | 2.3949 | 0.0403 | 0.001  |
| UP_G1 and UP_G5                                      | 1  | 1.8782 | 0.0471 | 0.001  |
| UP_G1 and UP_G6                                      | 1  | 2.5177 | 0.0530 | 0.001  |
| UP_G2 and UP_G3                                      | 1  | 1.3646 | 0.1852 | 0.032  |
| UP_G2 and UP_G4                                      | 1  | 1.5121 | 0.0496 | 0.006  |
| UP_G2 and UP_G5                                      | 1  | 1.3187 | 0.1165 | 0.023  |
| UP_G2 and UP_G6                                      | 1  | 1.4811 | 0.0801 | 0.003  |
| UP_G3 and UP_G4                                      | 1  | 1.3745 | 0.0452 | 0.018  |
| UP_G3 and UP_G5                                      | 1  | 1.5943 | 0.1375 | 0.003  |
| UP_G3 and UP_G6                                      | 1  | 1.7262 | 0.0922 | 0.002  |
| UP_G4 and UP_G5                                      | 1  | 1.6254 | 0.0469 | 0.001  |
| UP_G4 and UP_G6                                      | 1  | 2.4165 | 0.0570 | 0.001  |
| UP_G5 and UP_G6                                      | 1  | 2.0292 | 0.0469 | 0.001  |
| <u>Back Reef</u>                                     | 4  | 1.1111 | 0.2410 | 0.072  |
| <b>Environmental variation (One-way)</b>             |    |        |        |        |
| G1                                                   | 1  | 1.8359 | 0.0950 | 0.0001 |
| G2                                                   | 1  | 1.3700 | 0.1741 | 0.0062 |
| G3                                                   | 1  | 1.3509 | 0.1838 | 0.0338 |
| G4                                                   | 1  | 1.3700 | 0.1741 | 0.0049 |
| G5                                                   | 1  | 2.0273 | 0.1556 | 0.0012 |
| G6                                                   | 1  | 1.4294 | 0.0700 | 0.0035 |

**Supplementary Table 2.** One-way permutational multivariate analysis of variance (PERMANOVA) showing the effect of 'Colony size' on bacterial ASV composition.

| <b>Factor per analysis</b>          | <b><i>df</i></b> | <b><i>F</i></b> | <b><i>R2</i></b> | <b><i>p</i></b> |
|-------------------------------------|------------------|-----------------|------------------|-----------------|
| <b>Overall variation (One-way)</b>  |                  |                 |                  |                 |
| Colony size classes                 | 19               | 1.1520          | 0.1599           | 0.027           |
| <b>Genotype variation (One-way)</b> |                  |                 |                  |                 |
| G1                                  | 12               | 0.9267          | 0.3079           | 0.735           |
| G4                                  | 11               | 0.9575          | 0.3450           | 0.636           |
| G5                                  | 5                | 1.1300          | 0.4466           | 0.288           |
| G6                                  | 9                | 1.1412          | 0.4829           | 0.088           |

**Supplementary Figures**

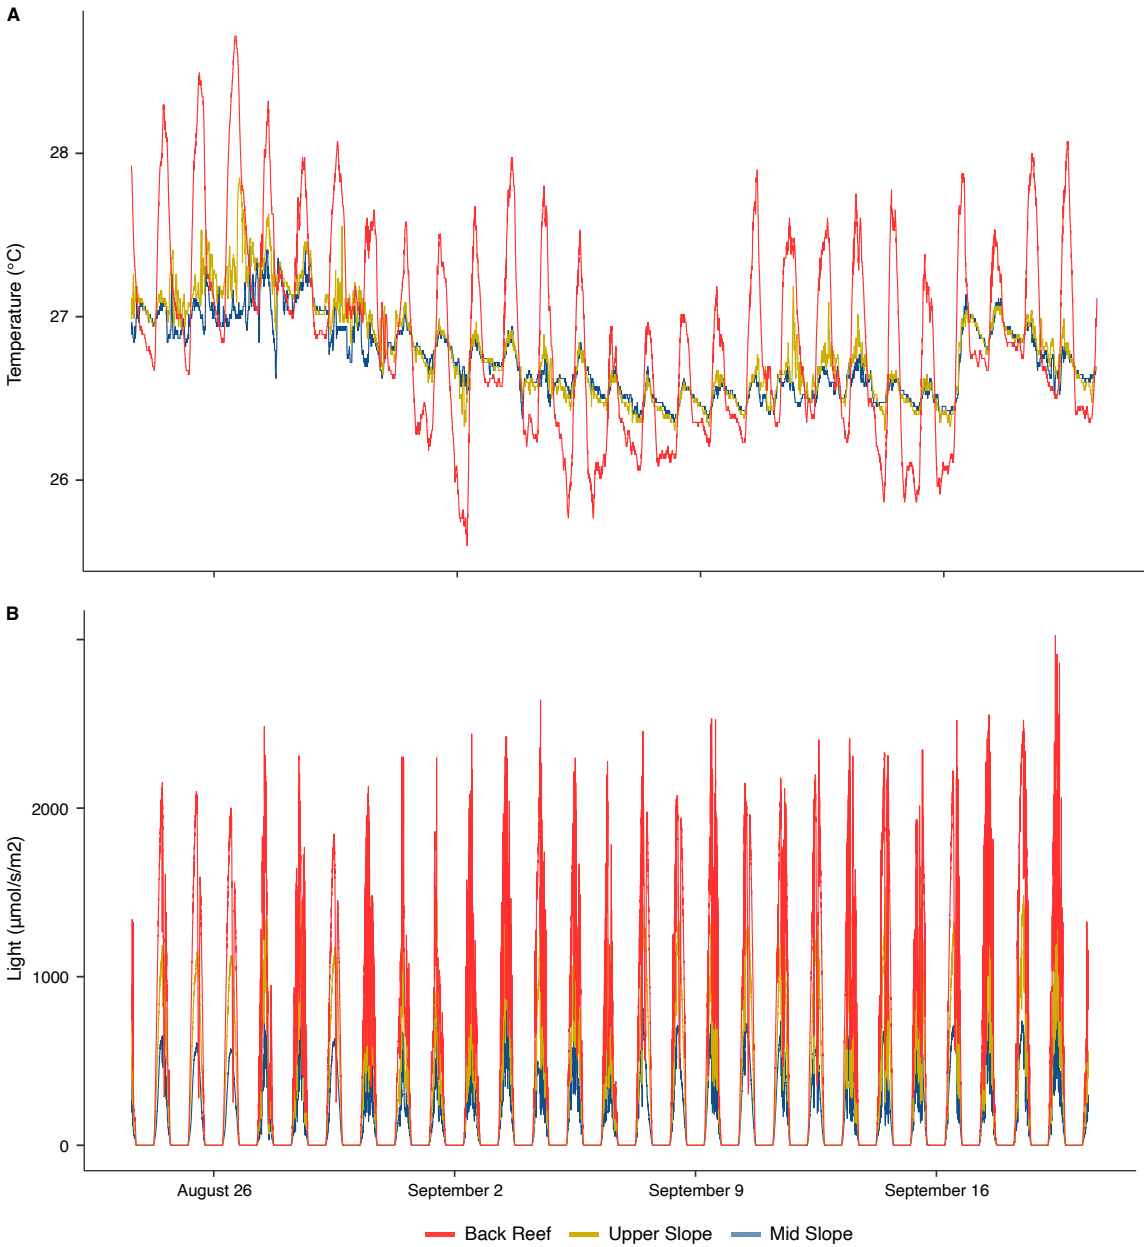

**Supplementary Figure 1 | Temperature (A) and light (B) profiles measured at each of the habitats over time.**

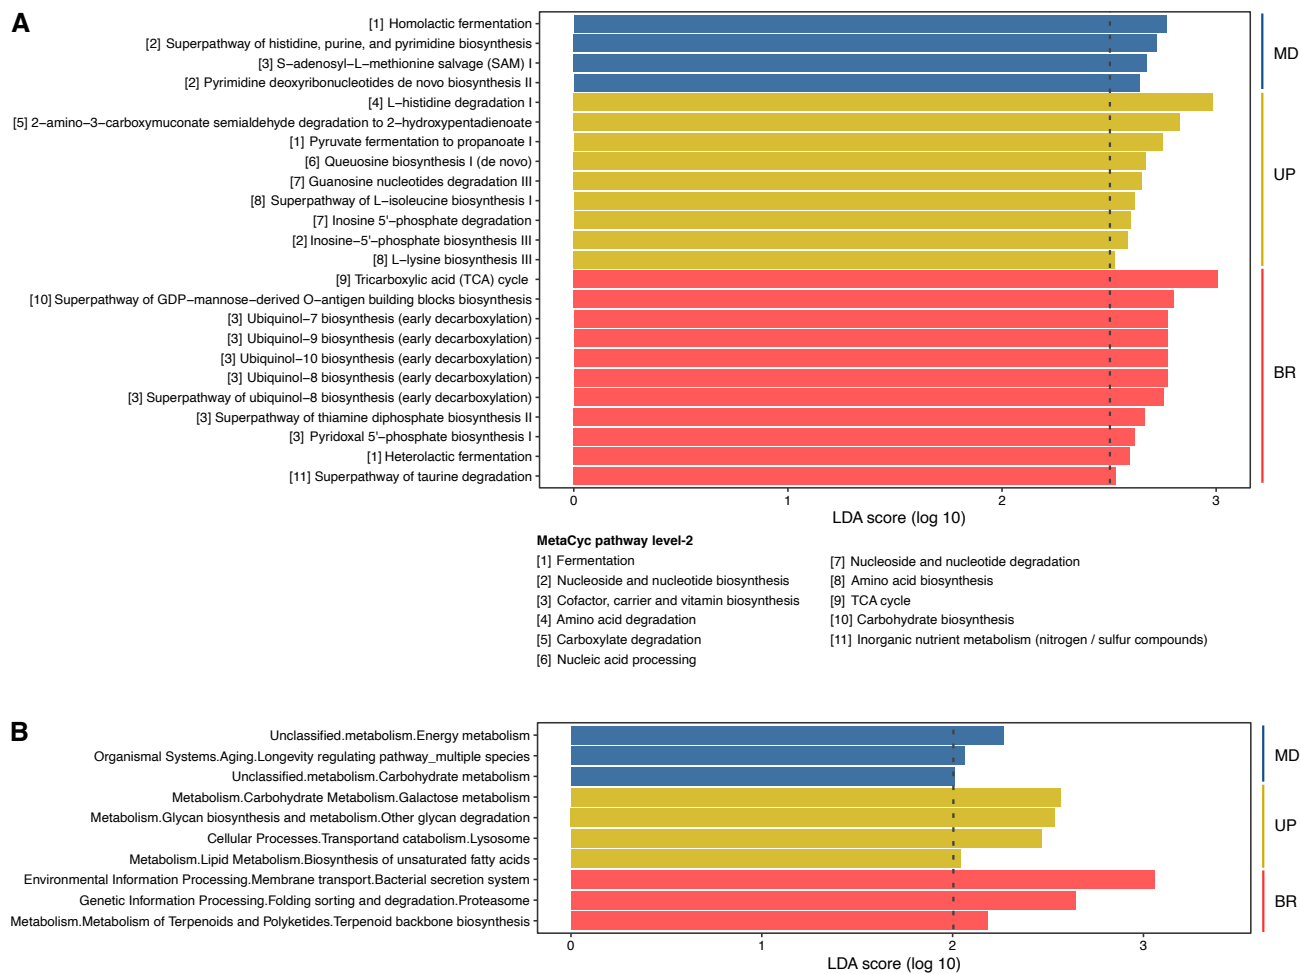

**Supplementary Figure 2 | LEfSe analysis displaying predicted functional profiles of the habitat-specific bacterial ASVs. Barplots show the 24 differentially abundant MetaCyc pathways (level 2 in brackets) (A) and the 10 KEGG pathways (level 3) (B) identified in the microbiomes of particular reef habitats, based on a Linear Discriminant Analysis (LDA,  $p < 0.05$  for factorial Kruskal–Wallis and pairwise Wilcoxon tests). Each color denotes the habitat, wherein the distinguishing functional traits were identified (Back reef = red, Upper slope = yellow, Mid slope = blue). Only MetaCyc and KEGG pathways meeting an LDA significant threshold  $> 2.5$  and  $2.0$ , respectively, are shown. The threshold of the logarithmic LDA score is represented by the dotted line. See Supplementary Data 5 for abundances of predicted gene counts of MetaCyc and KEGG pathways (level 1 to 3).**
